# Supplementary material for: A Fluorescent Biosensor for Sensitive Detection of Salmonella Typhimurium Using Low-Gradient Magnetic Field and Deep Learning via Faster Region-Based Convolutional Neural Network
Source: MDPI journal article supplement (doi:10.3390/bios11110447), 2021-11-11
Supplement: s1 [file s1]

Supplementary

# A Fluorescent Biosensor for Sensitive Detection of *Salmonella* Typhimurium Using Low-Gradient Magnetic Field and Deep Learning via Faster Region-Based Convolutional Neural Network

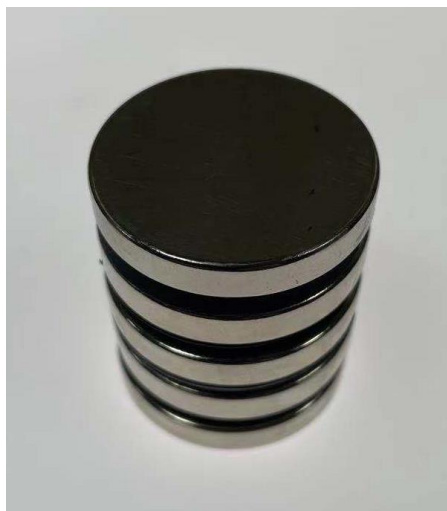

(a)

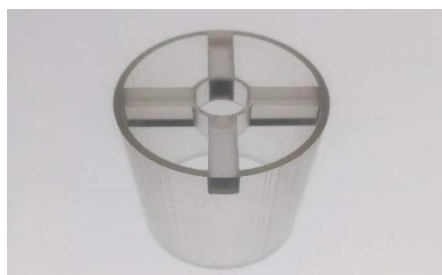

(b)

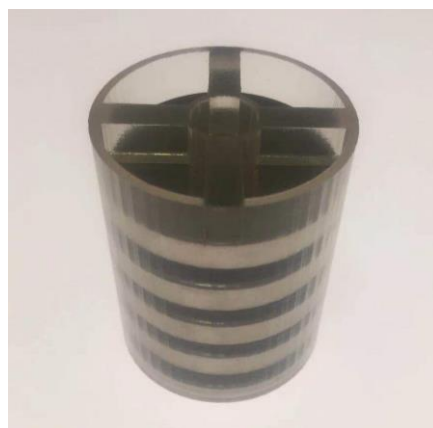

(c)

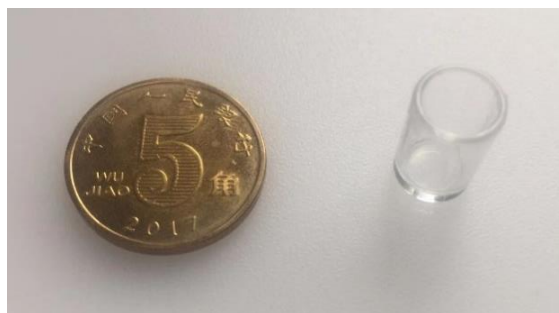

(d)

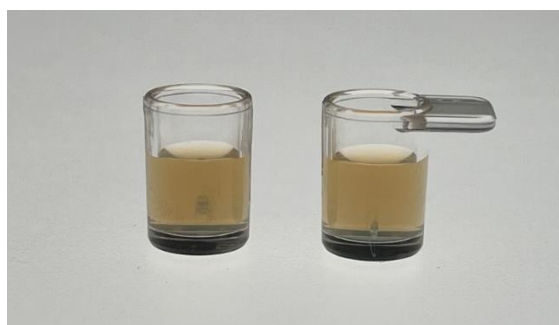

(e)

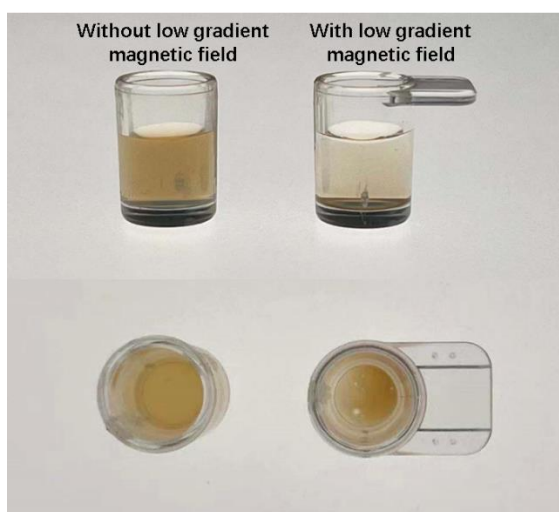

(f)

**Figure S1.** (a) Real picture of the cylindrical magnets; (b) 3D printed mold of the sleeve of cylindrical magnets; (c) Real picture of the low-gradient magnetic field equipment; (d) Real picture of the ELISA container; (e) The state of the complexes in an ELISA well before the application of low-gradient magnetic field; (f) The state of the complexes in an ELISA well after the application of low-gradient magnetic field.

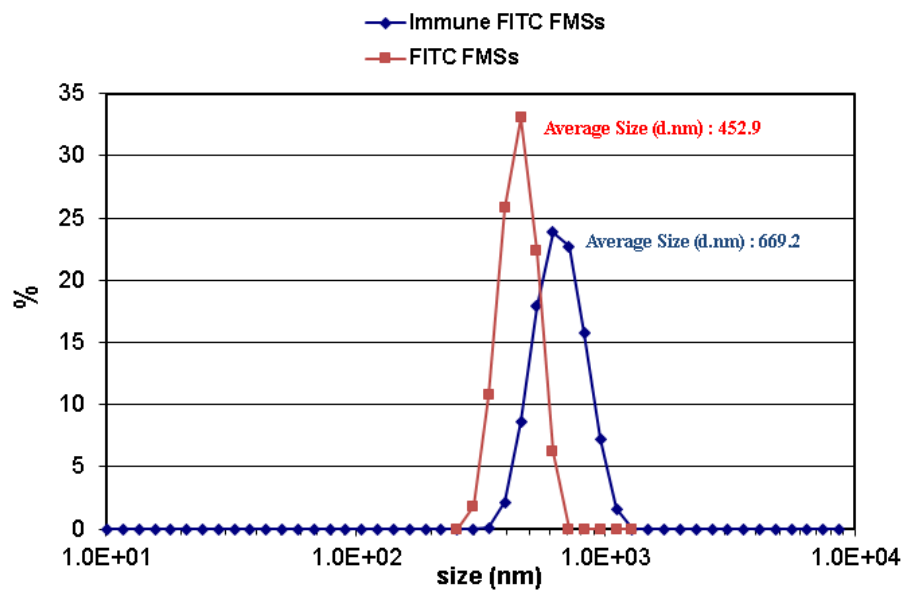

Figure S2. Hydration particle size analysis of FITC FMs and immune FITC FMs.

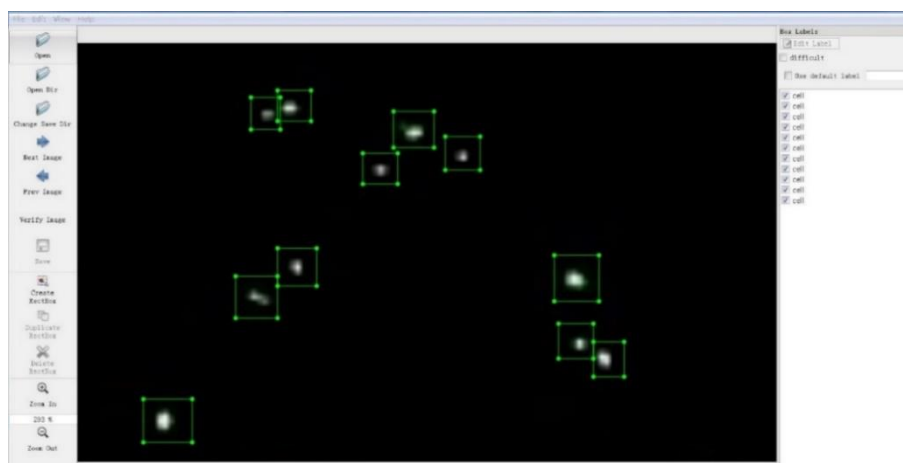

Figure S3. Situation of training set annotation with Labellmg software.

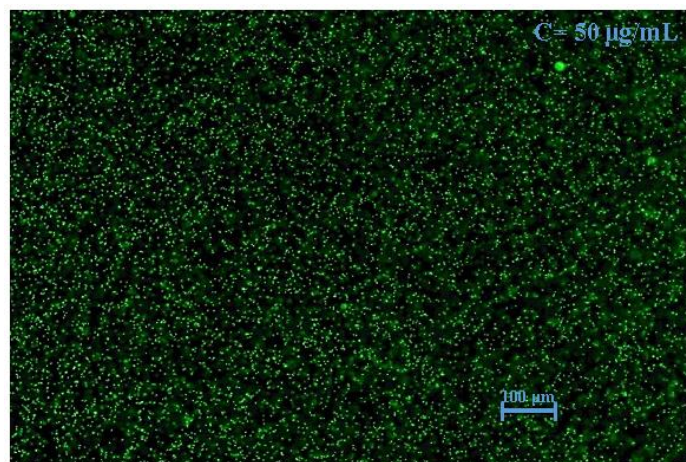

(a)

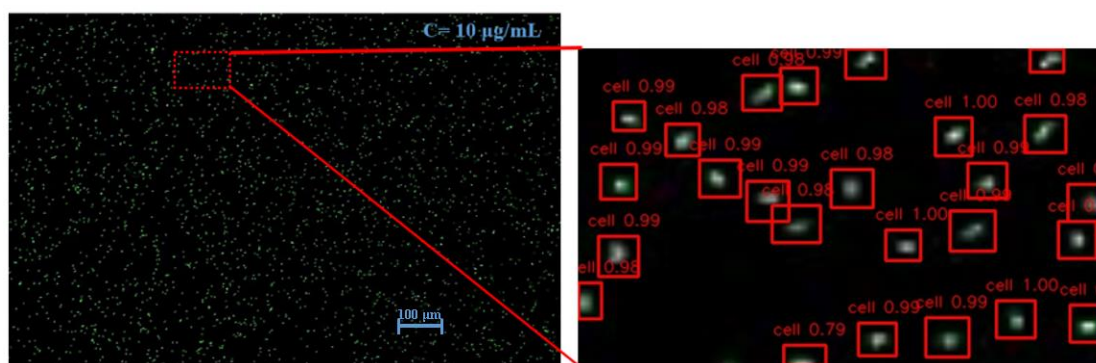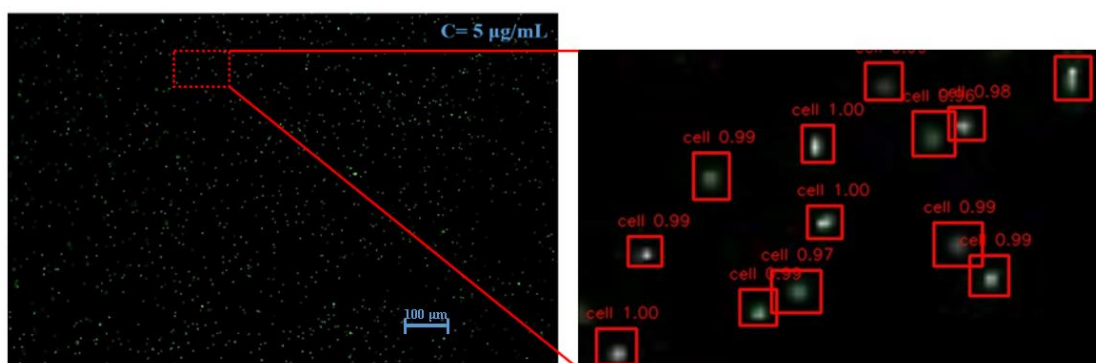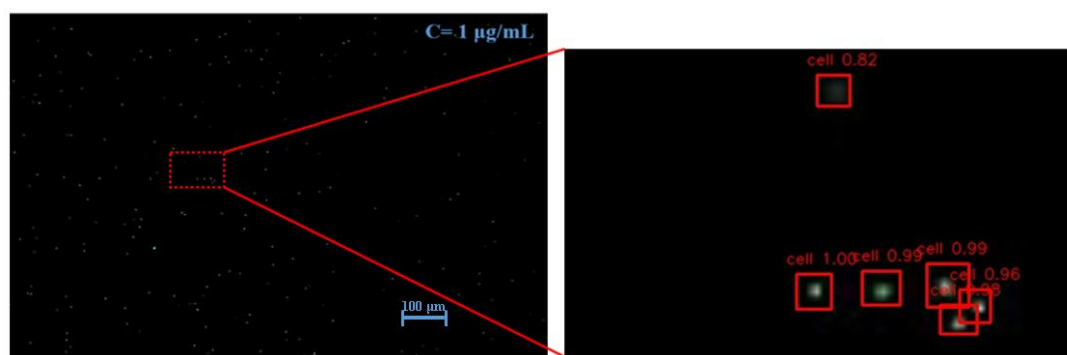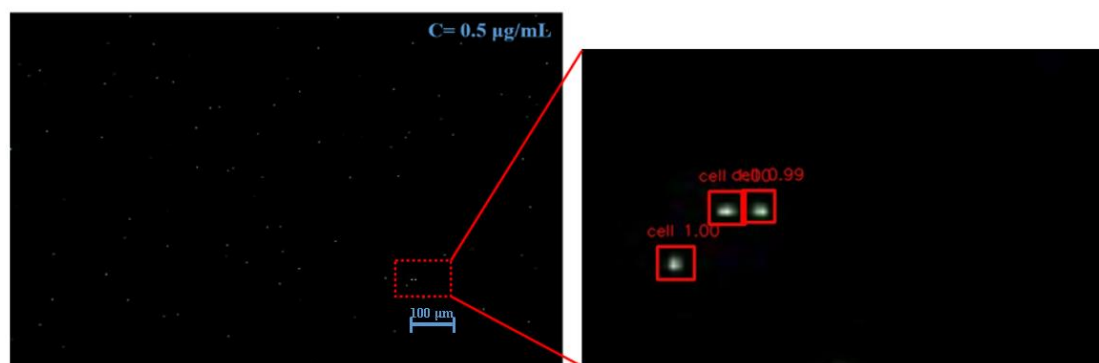

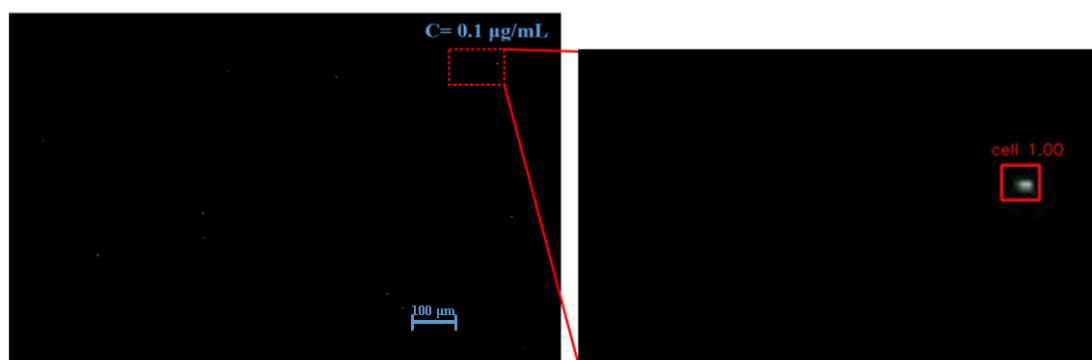

(f)

**Figure S4.** Characterization and identification of fluorescent spots for different concentrations of FITC FMs (a) 50  $\mu\text{g/mL}$ , (b) 10  $\mu\text{g/mL}$ , (c) 5  $\mu\text{g/mL}$ , (d) 1  $\mu\text{g/mL}$ , (e) 0.5  $\mu\text{g/mL}$ , (f) 0.1  $\mu\text{g/mL}$  using the faster R-CNN model. The scale bar is 100  $\mu\text{m}$ .

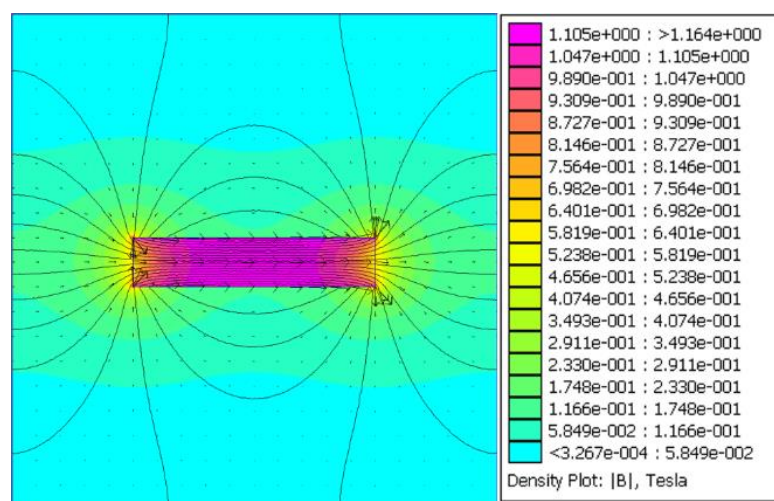

(a)

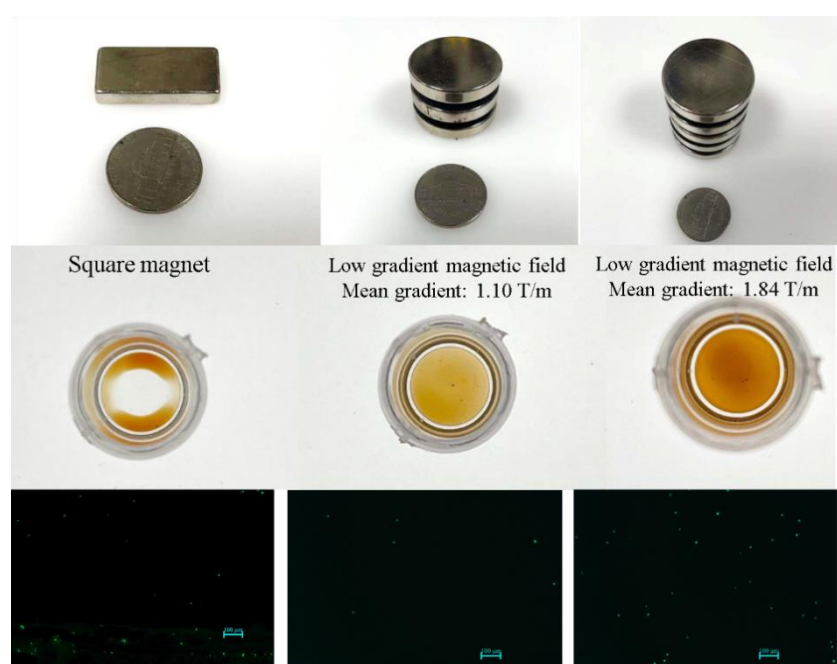

(b)

**Figure S5.** Characterization of magnetic nanobeads (MNBs) and fluorescent complexes under different distributions and different intensities of low-gradient magnetic field. (a) Simulation of magnetic field distribution around a square magnet; (b) The distribution of MNBs and fluorescent complexes on low-gradient magnetic field.

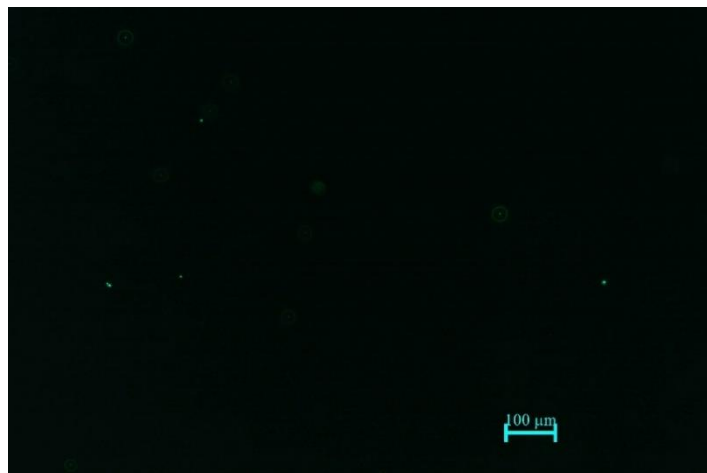

(a)

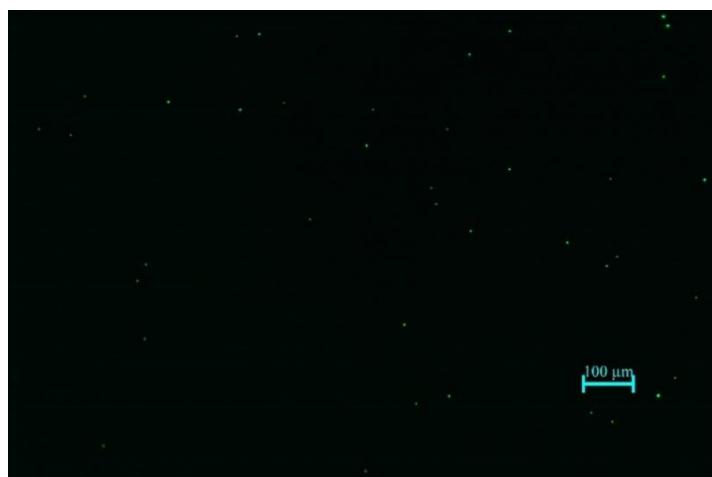

(b)

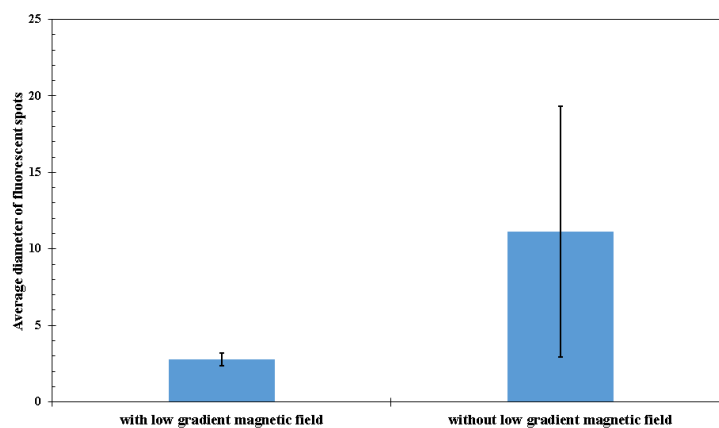

(c)

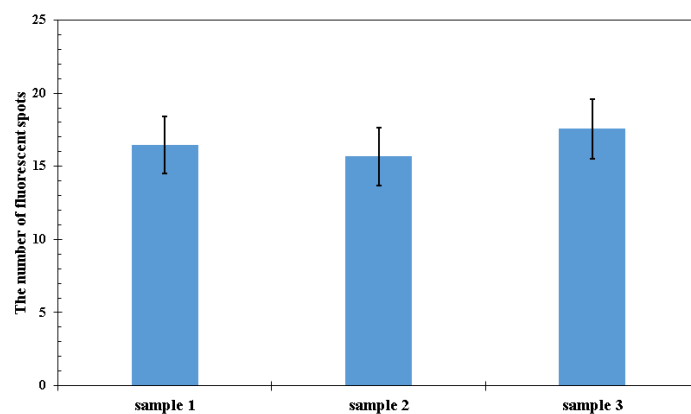

(d)

**Figure S6.** The characterization of the size of fluorescent complexes. (a) Morphologies of fluorescent complexes without low-gradient magnetic field; (b) Morphologies of fluorescent complexes with low-gradient magnetic field; (c) The histogram of the diameter of fluorescent complexes on different conditions (with or without low-gradient magnetic field); (d) Characterization of uniform distribution of fluorescent spots under the action of low-gradient magnetic field.

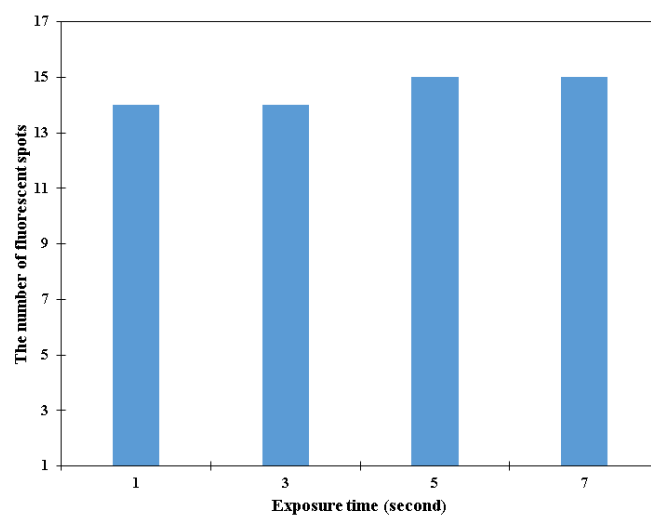

(a)

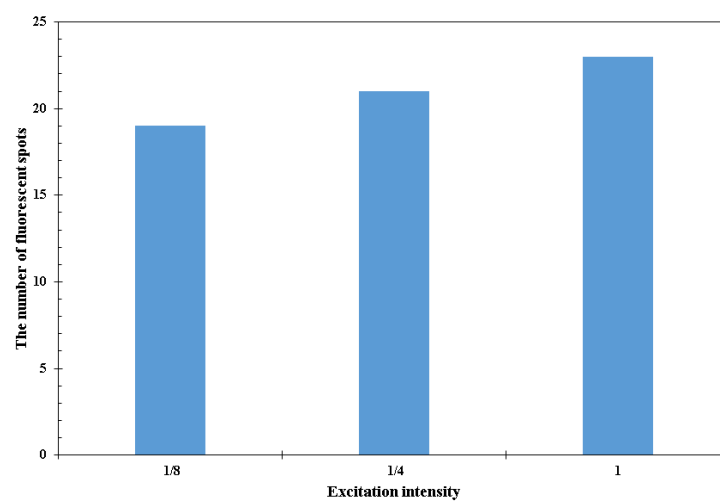

(b)



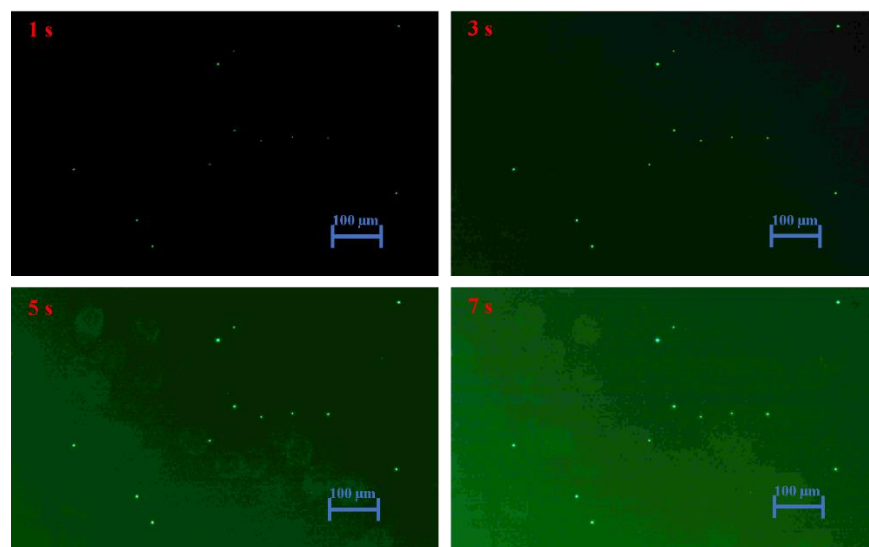

(c)

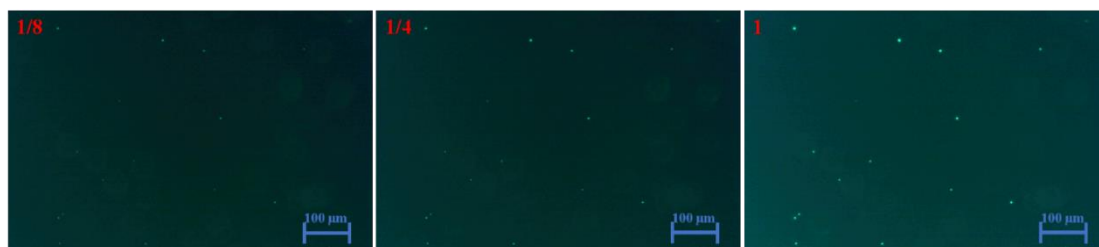

(d)

**Figure S7.** Characterization of recognition ability of faster R-CNN algorithm under different exposure times and different intensities of excitation light. (a) The number of fluorescent spots under different exposure times for same field of view; (b) The number of fluorescent spots under different intensities of excitation light for same field of view; (c) Fluorescent images in the same field under different exposure times; (d) Fluorescent images in the same field under different fluorescent intensities.

**Table S1.** Statistical analysis of uniform distribution of fluorescent bacteria under the low-gradient magnetic field.

|                 | 1  | 2  | 3  | 4  | 5  | 6  | 7  | 8  | 9  | AVERAGE | STDEV | AVEDEV | CV     |
|-----------------|----|----|----|----|----|----|----|----|----|---------|-------|--------|--------|
| <b>Sample 1</b> | 13 | 23 | 16 | 13 | 17 | 17 | 17 | 15 | 17 | 16.444  | 2.963 | 1.951  | 18.02% |
| <b>Sample 2</b> | 15 | 14 | 18 | 14 | 18 | 13 | 14 | 20 | 15 | 15.667  | 2.398 | 2.000  | 15.31% |
| <b>Sample 3</b> | 18 | 17 | 18 | 18 | 17 | 14 | 21 | 22 | 13 | 17.556  | 2.877 | 2.049  | 16.39% |

\* The mean value from the three measurements.

**Table S2.** Comparison of this proposed fluorescent biosensor with previously reported fluorescent biosensors.

| No. | Targets                       | Detection limit<br>(CFU/mL) | References |
|-----|-------------------------------|-----------------------------|------------|
| 1   | <i>shigella</i>               | $1.0 \times 10^4$           | [1]        |
| 2   | <i>Salmonella typhimurium</i> | $1.38 \times 10^2$          | [2]        |
| 3   | <i>Salmonella</i>             | $10^2$                      | [3]        |
| 4   | <i>Salmonella</i>             | $10^2$                      | [4]        |
| 5   | <i>E. coli</i> O157:H7        | $2.39 \times 10^2$          | [5]        |
| 6   | <i>Salmonella typhimurium</i> | $4.3 \times 10^1$           | [6]        |
| 7   | <i>Salmonella typhimurium</i> | $5.5 \times 10^1$           | This study |

## References



- 
- [1] F. Zhu, K. He, X. Zhang, D. Wei, S. Wang, Y. Li, Y. Chen, R. Zhao, Study on visual detection of *Shigella* by quantum dot labeling with fluorescence immunoassay strip in meat, *Food Research and Development* 2021, 42 (3), 136–140.
- [2] Z. Guo, X. Huang, Z. Li, J. Shi, X. Zhai, X. Hu, N. Liang, X. Zou, Rapid and highly sensitive detection of *Salmonella* typhimurium in lettuce by using magnetic fluorescent nanoparticles, *Anal. Methods* 2020, 12(48), 5861–5868.
- [3] Y. Meng, L. Liu, X. Yang, X. Dai, K. Chen, Rapid detection of *Salmonella* in chicken meat by fluorescent labeled DNA-magnetic graphene oxide magnetic separation technology, *Food and Fermentation Industries* 2020, 46(12), 251–257.
- [4] W.-W. Cui, L.-L. Xu, Y.-Y. Shi, N. Dong, P. Chen, Rapid Detection of *Salmonella* via Off-on Composite Fluorescent Probe Based on Fluorescence Resonance Energy Transfer, *Chinese Journal of Analytical Chemistry* 2019, 47(12), 1973–1980.
- [5] Z. Huang, J. Peng, J. Han, G. Zhang, Y. Huang, M. Duan, D. Liu, Y. Xiong, S. Xia, W. Lai, A novel method based on fluorescent magnetic nanobeads for rapid detection of *Escherichia coli* O157:H7, *Food Chemistry* 2019, 276, 333–341.
- [6] L. Hao, L. Xue, F. Huang, G. Cai, W. Qi, M. Zhang, Q.a. Han, Z. Wang, J. Lin, A Microfluidic Biosensor Based on Magnetic Nanoparticle Separation, Quantum Dots Labeling and MnO<sub>2</sub> Nanoflower Amplification for Rapid and Sensitive Detection of *Salmonella* Typhimurium, *Micromachines* 2020, 11 (3).
